# Supplementary material for: Template switching between the leading and lagging strands at replication forks generates inverted copy number variants through hairpin-capped extrachromosomal DNA
Source: PubMed Central journal article supplement (PMC10766183; doi:10.1371/journal.pgen.1010850), 2024-01-04

S5\_Fig: Dicentric → de novo telomere addition

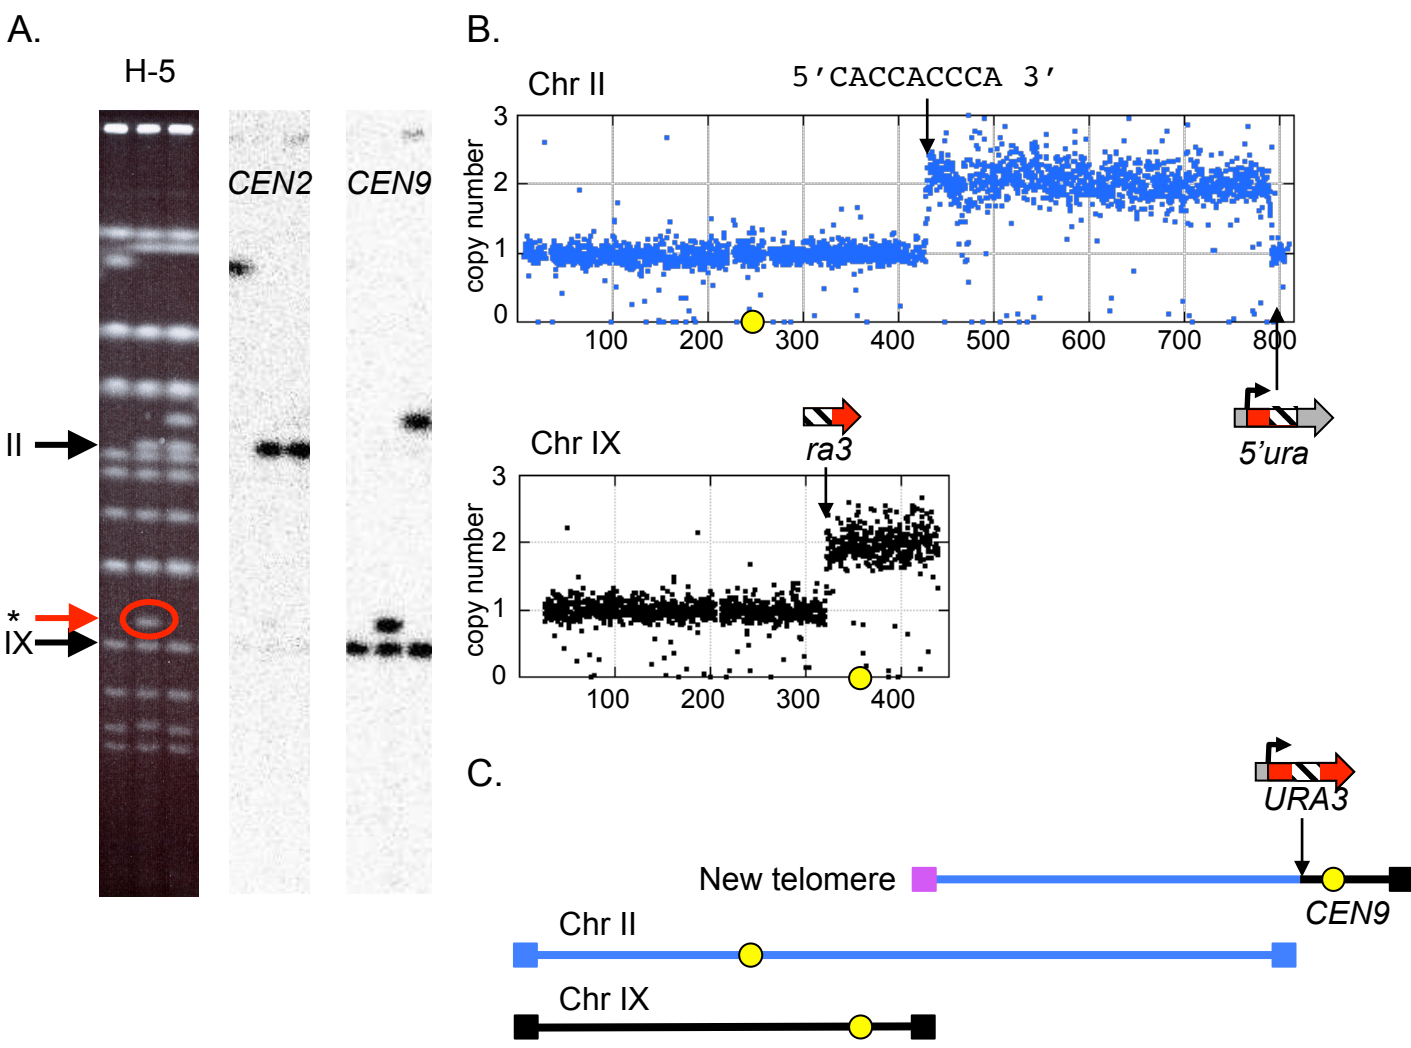

Supplement: pgen.1010850.s005.pdf [file pgen.1010850.s005.pdf]
