# Supplementary material for: Template switching between the leading and lagging strands at replication forks generates inverted copy number variants through hairpin-capped extrachromosomal DNA
Source: PLoS Genet. 2024 Jan 4;20(1):e1010850. doi: 10.1371/journal.pgen.1010850 (PMC10766183; doi:10.1371/journal.pgen.1010850)
Supplement: S3 Table — (XLSX) [file pgen.1010850.s014.xlsx]

## Sheet: Sheet1
Chr II coord (bp)	guide RNA	Primers used for cloning
708260:	AGATCAGACCGCTAATGAGAAGG	5' GATCAGATCAGACCGCTAATGAGAGTTTTAGAGCTAG 3'
		3' CTAGCTCTAAAACTCTCATTAGCGGTCTGATCT 5"
792883:	CACTCCATACTCGCCATCGCTGG	5' GATCCACTCCATACTCGCCATCGCGTTTTAGAGCTAG 3'
		3' CTAGCTCTAAAACGCGATGGCGAGTATGGAGTG 5'
